1 **Title: Heat Hardening of a Larval Amphibian is Dependent on Acclimation Period and**  
2 **Temperature**

3 **Running Title: Hardening in a Larval Amphibian**

4 Jason Dallas<sup>1,2</sup> and Robin W. Warne<sup>1</sup>

5 <sup>1</sup>Southern Illinois University, School of Biological Sciences, 1125 Lincoln Dr., Carbondale, IL,  
6 62901-6501

7 <sup>3</sup>Corresponding Author: dallasjason2@gmail.com

8 **Keywords:** heat hardening,  $CT_{max}$ , wood frogs, thermal acclimation, thermal plasticity

9 **Summary Statement:** A larval amphibian follows the trade-off hypothesis such that the group  
10 with the highest basal heat tolerance displays the lowest hardening response and vice-versa.

11

12 **Abstract**

13           The thermal tolerance–plasticity trade-off hypothesis states that acclimation to warmer  
14 environments increases basal thermal tolerance in ectotherms but reduces plasticity in coping  
15 with acute thermal stress characterized as heat hardening. We examined the potential trade-off  
16 between basal heat tolerance and hardening plasticity, measured as critical thermal maximum  
17 ( $CT_{max}$ ) of a larval amphibian, *Lithobates sylvaticus*, in response to differing acclimation  
18 temperatures (15° and 25°C) and periods (3 or 7 days). A hardening treatment applied 2 hours  
19 before  $CT_{max}$  assays induced pronounced plastic hardening responses in the cool, 15°C treatment  
20 after 7 days of acclimation, compared to controls. Warm acclimated larvae at 25°C, by contrast,  
21 exhibited minor hardening responses, but significantly increased basal thermal tolerance. These  
22 results support the trade-off hypothesis and fill a knowledge gap in larval amphibian thermal  
23 plasticity. Elevated environmental temperatures induce acclimation in heat tolerance yet  
24 constrains ectotherm capacity to cope with further acute thermal stress.

25

26

## 27 **Introduction**

28 Environmental temperature is one of the most important abiotic drivers of organismal  
29 physiology (Angilletta Jr, 2009). As temperatures increase due to climate change, ectotherms  
30 will be under greater risk of approaching their upper thermal limit that will lead to shifts in  
31 species distributions, altered biological interactions, and reduced activity periods, all of which  
32 can result in extinction (Bellard et al., 2012; Blois et al., 2013; Cox et al., 2022; Somero, 2010).  
33 Global declines in amphibians have been linked to climate change (e.g., Blaustein et al., 2010;  
34 Campbell Grant et al., 2020; Lowe et al., 2021; Rollins-Smith, 2017), highlighting the need for  
35 continued research on how they respond to warming and thermal extremes.

36 As thermal traits generally evolve slowly in herpetofauna (Bodensteiner et al., 2020),  
37 phenotypic plasticity is likely a primary response to climate change and increasing thermal  
38 stress. Thermal acclimation represents reversible plasticity in basal heat tolerance and develops  
39 over days to weeks of chronic exposure to altered environmental temperatures (e.g., Cupp Jr,  
40 1980; Lapwong et al., 2021b; Li et al., 2009; Rohr et al., 2018; Sgro et al., 2010). However,  
41 acclimation does not necessarily protect organisms against acute exposure to short-term heat  
42 events such as heat waves which are projected to increase in frequency (Seneviratne et al., 2021).  
43 The related heat hardening response is another form of thermal plasticity that, by contrast,  
44 develops rapidly over minutes to hours of exposure to acute heat stress (Bowler, 2005). Heat  
45 hardening is generated by exposing organisms to temperatures near or at their upper thermal  
46 limit. While hardening rapidly increases heat tolerance, these increases are transient and  
47 disappear within 36 hours (Deery et al., 2021; Maness and Hutchison, 1980; Phillips et al., 2016;  
48 Rutledge et al., 1987; but see Moyen et al., 2020), highlighting its role as a short-term protection  
49 mechanism. Therefore, plasticity in heat tolerance occurs at two different levels: basal thermal  
50 tolerance, measured as the limits of thermal performance curves (Huey and Stevenson, 1979),  
51 following an acclimation period, and hardening, which temporarily increases basal thermal  
52 tolerance following an acute heat stress.

53 Under an ideal scenario, both high basal thermal tolerance and hardening would improve  
54 ectotherm persistence under climate change. However, there appears to be a physiological  
55 limitation such that elevated basal thermal tolerance constrains the capacity of an organism to  
56 further increase their heat tolerance. For example, Stillman (2003) found a negative relationship  
57 between basal thermal tolerance and acclimation capacity in *Petrolisthes* crab populations across

58 a latitudinal gradient. Building upon this, van Heerwaarden and Kellermann (2020) identified  
59 that this negative link was widespread across ectothermic clades and named this pattern the  
60 tolerance–plasticity trade-off hypothesis. Heat shock proteins (HSPs) may underlie the trade-off  
61 hypothesis because of the central role they play in maintaining homeostasis during extreme  
62 temperatures (Feder and Hofmann, 1999; Sørensen et al., 2003) and improving basal thermal  
63 tolerance (Bahrndorff et al., 2009; Blair and Glover, 2019; Gao et al., 2014; Krebs and Feder,  
64 1998; but see Easton et al., 1987; Jensen et al., 2010). Because HSPs are energetically expensive  
65 to produce and maintain (e.g., Hoekstra and Montooth, 2013), populations from warm  
66 environments may be ‘preadapted’ to favor relatively high constitutive HSP expression to elevate  
67 basal thermal tolerance but exhibit less flexibility in upregulation following an acute heat shock  
68 compared to cool environment populations (Gleason and Burton, 2015). Therefore, under the  
69 trade-off hypothesis, hardening may be more useful to species that are less likely to experience  
70 chronic heat stress but receive greater benefits in combating acute stress (van Heerwaarden and  
71 Kellermann, 2020; but see Sgro et al., 2010). Thus, acute upper thermal limits that are near or  
72 pushed near adapted thermal maxima restrict additional plasticity for further increased thermal  
73 tolerance through acclimation (Somero, 2010). While a meta-analysis on ectotherms by Barley et  
74 al. (2021) provided support for the trade-off hypothesis, there is mixed evidence in larval  
75 amphibians (e.g., Menke and Claussen, 1982; Simon et al., 2015; Turriago et al., 2022)  
76 suggesting a need for further exploration.

77 The role of heat hardening in adult (Maness and Hutchison, 1980) and larval amphibians  
78 (Sherman and Levitis, 2003; Sørensen et al., 2009) is understudied. We aimed to investigate the  
79 trade-off hypothesis by testing how acclimation temperatures (low or high) and duration (short or  
80 long acclimation periods) affect interactions between heat hardening and basal thermal tolerance  
81 – estimated via critical thermal maximum ( $CT_{max}$ ). These tests were conducted on larval wood  
82 frogs, *Lithobates sylvaticus* (LeConte 1825). Because larval anurans display a positive  
83 relationship between acclimation temperature and  $CT_{max}$  (e.g., Cupp Jr, 1980; Ruthsatz et al.,  
84 2022), we predicted that longer acclimation to warmer temperatures would increase basal heat  
85 tolerance compared to those acclimated to cooler temperatures. In line with the trade-off  
86 hypothesis, we also expected the hardening effect would be most pronounced in larvae with the  
87 lowest  $CT_{max}$  suggesting greater acute thermal plasticity under these environments.

## 89 **Materials and Methods**

### 90 *Field Collection and Husbandry*

91 Freshly laid (< 36 hours old) wood frog egg masses were collected from wetlands in  
92 Jackson Co., IL under an Illinois Department of Natural Resources permit (HSCP 19-03). The  
93 egg masses were maintained in 60 L plastic containers with aerated, carbon-filtered water. After  
94 hatching, larvae were initially fed autoclaved algal flakes (Bug Bites Spirulina Flakes, Fluval  
95 Aquatics, Mansfield, MA, USA), followed by crushed alfalfa pellets at two weeks after hatching.  
96 Animals were fed twice weekly, and water was changed weekly. All experimental procedures  
97 were approved by the Southern Illinois University Institutional Animal Care and Use Committee  
98 (22-008).

### 99 *Critical Thermal Maximum Assay*

100 After larvae reached early pro-metamorphic stages, 64 individuals were randomly  
101 selected and staged, weighed, and transferred to individual 750 mL plastic containers filled with  
102 600 mL of aged (>24 hours) aerated, carbon-filtered water. Larvae were split (N=32/treatment)  
103 into low ( $15^{\circ}\text{C} \pm 0.2$ ) and high ( $25^{\circ}\text{C} \pm 0.3$ ) acclimation temperatures. There were no differences  
104 in initial Gosner (1960) stage (range = 27 – 35) or mass (0.25 – 0.55 g) between these groups (P  
105 > 0.3). The larvae were further randomly split into four groups (n=8 per group) that differed in  
106 acclimation period and heat hardening treatment: 1) 3-day control, 2) 3-day hardened, 3) 7-day  
107 control, and 4) 7-day hardened. Larvae were acclimated to low or high temperatures for either  
108 three or seven days. On the last day of acclimation, the  $\text{CT}_{\text{max}}$  of control groups was measured.  
109 The hardened groups were heated for 10 minutes at  $2-4^{\circ}\text{C}$  below the  $\text{CT}_{\text{max}}$  of control groups,  
110 following the protocol of Sherman and Levitis (2003). After this heat hardening treatment, the  
111 animals were returned to their acclimation temperatures for 2 hours, after which their  $\text{CT}_{\text{max}}$  was  
112 measured. Sample sizes were reduced to seven for the 7-day hardened low and high temperatures  
113 groups, and the 7-day control low temperature group due to mortality.

114  $\text{CT}_{\text{max}}$  was measured between 1000 – 1600 hrs to minimize potential diel effects on heat  
115 tolerance (Healy and Schulte, 2012; Maness and Hutchison, 1980). Larvae were staged, weighed,  
116 and then placed in individual 125 mL flasks filled with 75 mL of aged, aerated, carbon-filtered  
117 water and submerged in a hot water bath (Isotemp 220, Fischer Scientific) and given 5 minutes  
118 to acclimate prior to beginning the assay. Water temperatures increased  $0.6 \pm 0.01^{\circ}\text{C}$  per minute  
119 from a starting temperature of  $19.9 \pm 0.2^{\circ}\text{C}$ . Beginning at  $\sim 34^{\circ}\text{C}$ , larvae were prodded with a

120 spatula every 30 seconds until they did not respond to the stimulus. At this point, a thermocouple  
121 probe (Physitemp BAT-12) was placed in the flask, water temperature was recorded which  
122 represented the larval  $CT_{max}$ . Flasks were then placed in a water bath at room temperature to  
123 facilitate larval recovery, and all larvae recovered  $\leq 5$  minutes. Upon completion of  $CT_{max}$   
124 measurements, all larvae were euthanized via snap-freezing in  $-80^{\circ}\text{C}$  ethanol.

### 125 *Statistical Analyses*

126 We assessed how larval  $CT_{max}$  shifted in response to our various treatments using a  
127 general linear model. While Gosner stage recorded prior to the  $CT_{max}$  measurement was normally  
128 distributed, mass was log-transformed to achieve normality, and both were included as covariates  
129 in the model. Fixed effects included acclimation period (3 or 7 days), acclimation temperature  
130 (low or high), hardening treatment (control or hardened), and their interactions. Post-hoc  
131 analyses were conducted using Tukey tests. All analyses were conducted in R Studio v.  
132 2022.02.3 (<https://www.Rstudio.com/>) and significance values were set as  $\alpha = 0.05$ .

133 **Results**

134           Across all treatments, wood frog larvae displayed a moderate degree of variation in their  
135  $CT_{max}$  (range = 35.8° – 39.6°C; Table 1). Two individuals were dropped from analyses due to  
136 abnormally low  $CT_{max}$  values ( $\leq 34.9^\circ\text{C}$ ) in relation to their group mean. Of the main effects,  
137 only acclimation temperature ( $F_{1,49} = 6.52$ ,  $P = 0.014$ ) had a significant effect (Table 2) with  
138 those in the high acclimation temperature treatment exhibiting greater heat tolerance (Fig. 1).  
139 While neither hardening ( $F_{1,49} = 0.088$ ,  $P = 0.77$ ) nor acclimation period ( $F_{1,49} = 2.55$ ,  $P = 0.12$ )  
140 had significant effects on  $CT_{max}$ , there was significant hardening by acclimation period ( $F_{1,49} =$   
141  $6.11$ ,  $P = 0.017$ ) and acclimation period by acclimation temperature ( $F_{1,49} = 18.71$ ,  $P < 0.0001$ )  
142 interactions. The former was driven by a more pronounced hardening effect for day 7  
143 individuals, while the latter was the outcome of a pronounced increase in  $CT_{max}$  among larvae in  
144 the high acclimation treatment on day 7 (Fig. 1). Lastly, a significant three-way interaction was  
145 found for acclimation period, acclimation temperature, and hardening treatment ( $F_{1,49} = 4.47$ ,  $P =$   
146  $0.040$ ). Larvae in the low acclimation treatment on day 7 showed the largest hardening effect of  
147  $0.9^\circ\text{C}$ , which was more than double the hardening effect of any other group (Fig. 1). Larval mass  
148 and Gosner stage were unrelated to  $CT_{max}$  ( $P \geq 0.29$ ).

149

## 150 Discussion

151 Phenotypic plasticity of heat tolerance provides ectotherms the ability to counter the  
152 threat of overheating due to temperature extremes associated with climate change. Heat  
153 hardening, a form of thermal plasticity, represents the “first line of defense” against heat stress  
154 (Deery et al., 2021) through rapid upregulation of HSPs and/or changes to cellular structure in  
155 response to an acute thermal shock that can increase short-term heat tolerance (Bowler, 2005).  
156 However, the tolerance–plasticity trade-off hypothesis (van Heerwaarden and Kellermann, 2020)  
157 proposes that basal heat tolerance and thermal plasticity are negatively correlated; such that  
158 individuals with high  $CT_{max}$  have limited hardening (Gilbert and Miles, 2019). While numerous  
159 studies have demonstrated that amphibians exhibit plastic basal heat tolerance (e.g., Cupp Jr,  
160 1980; Ruthsatz et al., 2022), hardening remains understudied.

161 In our study, we found evidence in support of the trade-off hypothesis for larval wood  
162 frogs, although the effect was minor (Fig. 1), potentially due to low sample sizes. The group with  
163 the lowest mean  $CT_{max}$  (36.5°C) had the greatest hardening effect (0.9°C), while the group with  
164 the highest mean  $CT_{max}$  (39.0°C) had a minimal hardening effect (0.1°C). While the 0.9°C  
165 hardening effect was comparable to larval American toads (*Anaxyrus americanus*) and African  
166 clawed frogs (*Xenopus laevis*) (Sherman and Levitis, 2003), the remaining groups had a minor  
167 hardening response ( $\leq 0.4^\circ\text{C}$ ) that was similar with values for larval bullfrogs (*L. catesbeianus*)  
168 (Menke and Claussen, 1982). Additionally, the bullfrogs showed no evidence of the trade-off  
169 hypothesis as  $CT_{max}$  increased positively with acclimation temperatures while hardening effect  
170 was unchanged. Hardening effects in lizard, salamander, and fish species are variable ranging  
171 from  $-0.4^\circ\text{C}$  (*Anolis sagrei*) to  $2.1^\circ\text{C}$  (*A. carolinensis*) (Deery et al., 2021; Lapwong et al.,  
172 2021a; Maness and Hutchison, 1980; Phillips et al., 2016; Rutledge et al., 1987). In relation to  
173 other species, larval wood frogs acclimated to cooler conditions have a relatively strong  
174 hardening effect indicating significant plasticity in heat tolerance to improve their tolerance of  
175 overheating. This may benefit wood frogs as ephemeral pond breeding species are threatened by  
176 climate change (Blaustein et al., 2010) during the larval stage (Enriquez-Urzelai et al., 2019).

177 We can only speculate on the mechanism that drove the observed results, but we propose  
178 that HSPs represent an intriguing answer. This is because they are intimately tied to  
179 environmental temperature (Dalvi et al., 2012; Gu et al., 2019; Jin et al., 2019) and basal  
180 thermotolerance (Bahrndorff et al., 2009; Blair and Glover, 2019). Warm-tolerant ectotherms



181 often express higher constitutive levels of *hsp70* relative to less-tolerant populations, but that an  
182 acute heat-stress results in greater *hsp70* expression in those with lower basal thermal tolerance  
183 (Gleason and Burton, 2015; Zatssepina et al., 2000; Zatssepina et al., 2001). Zatssepina et al. (2000)  
184 proposed that this provided temperate populations the capability to rapidly and intensely  
185 synthesize HSPs after brief exposure to heat shock that was absent in low latitude populations.  
186 We propose a similar pattern in the wood frog larvae, such that higher constitutive HSP levels in  
187 warm-acclimated larvae provided increased basal heat tolerance compared to cold-acclimated  
188 larvae, yet hardened larvae from the latter group greatly upregulated HSP expression following a  
189 heat shock enhancing their hardening response. This is in line with *Drosophila* acclimated to  
190 cooler temperatures (Bettencourt et al., 1999), which exhibited pronounced hardening plasticity  
191 that was absent in the warm-acclimated group. Quantifying constitutive and heat-shocked *hsp70*  
192 mRNA of larval liver and gill tissues would offer support to this conclusion. Additionally, many  
193 ectotherms appear to have hard upper-limits to thermal tolerance after which their pejus range  
194 constrains any further plastic responses (Denny and Dowd, 2012). Thus, the warm acclimated  
195 larvae in our study could have approached their physiologically and evolutionarily determined  
196 upper limit that constrained any further plastic responses. Future tests are required to understand  
197 1) if there is a degree of plasticity to hard upper limits of thermal acclimation, 2) the cellular and  
198 physiological mechanisms underlying these limits, 3) how these mechanisms determine the  
199 trade-offs between hardening and acclimation to chronic heat stress, and 4) how these  
200 mechanistic interactions are shaped by evolution in comparative studies.

201 Wood frog larvae with low basal heat tolerance demonstrated a large hardening effect  
202 suggesting a trade-off between the two traits. There is an inherent link between  $CT_{max}$  and  
203 hardening which may bias the presence of the trade-off hypothesis (van Heerwaarden and  
204 Kellermann, 2020), and Deery et al. (2021) proposed that correlative evidence of the trade-off  
205 hypothesis is a statistical artifact. However, we believe our methodology of using different  
206 individuals for  $CT_{max}$  and hardening removed the risks of spurious correlation and strengthened  
207 our analyses. Based on our results, we propose that larval wood frogs support the trade-off  
208 hypothesis after a relatively short acclimation period. Hardening benefits cool-acclimated  
209 populations in response to acute heat stress but plasticity in basal heat tolerance in response to  
210 prolonged warming are likely to be more beneficial in reducing overheating risk.

211

212 **Acknowledgements** We would like to thank Jared Bilak, Abigail Pratt, Matthew Walker, and  
213 Justin Remmers for feedback and comments on our manuscript. We would like to thank the two  
214 anonymous reviewers for helpful feedback on this manuscript.

215 **Competing Interests** The authors declare no competing or financial interests.

216 **Author contributions** Conceptualization: J.D.; Methodology: J.D.; Formal analysis: J.D.;  
217 Investigation: J.D.; Data curation: J.D.; Writing - original draft: J.D.; Writing - review & editing:  
218 J.D., R.W.; Supervision: R.W.; Project administration: J.D.; Funding acquisition: R.W.

219 **Funding** This research was funded through a Southern Illinois University Carbondale (SIUC)  
220 startup grant to R. W. Warne.

221 **References**

222 **Angilletta Jr, M. J.** (2009). Thermal adaptation: a theoretical and empirical synthesis:  
223 Oxford University Press.

224 **Bahrndorff, S., Mariën, J., Loeschcke, V. and Ellers, J.** (2009). Dynamics of heat-  
225 induced thermal stress resistance and Hsp 70 expression in the Springtail, *Orchesella cincta*.  
226 *Functional Ecology*, 233-239.

227 **Barley, J. M., Cheng, B. S., Sasaki, M., Gignoux-Wolfsohn, S., Hays, C. G., Putnam,**  
228 **A. B., Sheth, S., Villeneuve, A. R. and Kelly, M.** (2021). Limited plasticity in thermally  
229 tolerant ectotherm populations: evidence for a trade-off. *Proc Biol Sci* **288**, 20210765.

230 **Bellard, C., Bertelsmeier, C., Leadley, P., Thuiller, W. and Courchamp, F.** (2012).  
231 Impacts of climate change on the future of biodiversity. *Ecol Lett* **15**, 365-377.

232 **Bettencourt, B. R., Feder, M. E. and Cavicchi, S.** (1999). Experimental evolution of  
233 Hsp70 expression and thermotolerance in *Drosophila melanogaster*. *Evolution* **53**, 484-492.

234 **Blair, S. D. and Glover, C. N.** (2019). Acute exposure of larval rainbow trout  
235 (*Oncorhynchus mykiss*) to elevated temperature limits hsp70b expression and influences future  
236 thermotolerance. *Hydrobiologia* **836**, 155-167.

237 **Blaustein, A. R., Walls, S. C., Bancroft, B. A., Lawler, J. J., Searle, C. L. and**  
238 **Gervasi, S. S.** (2010). Direct and Indirect Effects of Climate Change on Amphibian Populations.  
239 *Diversity* **2**, 281-313.

240 **Blois, J. L., Zarnetske, P. L., Fitzpatrick, M. C. and Finnegan, S.** (2013). Climate  
241 change and the past, present, and future of biotic interactions. *Science* **341**, 499-504.

242 **Bodensteiner, B. L., Agudelo-Cantero, G. A., Arietta, A. Z. A., Gunderson, A. R.,**  
243 **Munoz, M. M., Refsnider, J. M. and Gangloff, E. J.** (2020). Thermal adaptation revisited:  
244 How conserved are thermal traits of reptiles and amphibians? *J Exp Zool A Ecol Integr Physiol*.

245 **Bowler, K.** (2005). Acclimation, heat shock and hardening. *Journal of Thermal Biology*  
246 **30**, 125-130.

247 **Campbell Grant, E. H., Miller, D. A. W. and Muths, E.** (2020). A Synthesis of  
248 Evidence of Drivers of Amphibian Declines. *Herpetologica* **76**.

249 **Cox, N., Young, B. E., Bowles, P., Fernandez, M., Marin, J., Rapacciuolo, G., Bohm,**  
250 **M., Brooks, T. M., Hedges, S. B., Hilton-Taylor, C. et al.** (2022). A global reptile assessment  
251 highlights shared conservation needs of tetrapods. *Nature*.

- 252           **Cupp Jr, P. V.** (1980). Thermal tolerance of five salientian amphibians during  
253 development and metamorphosis. *Herpetologica*, 234-244.
- 254           **Dalvi, R. S., Pal, A. K., Tiwari, L. R. and Baruah, K.** (2012). Influence of acclimation  
255 temperature on the induction of heat-shock protein 70 in the catfish *Horabagrus brachysoma*  
256 (Gunther). *Fish Physiology and Biochemistry* **38**, 919-927.
- 257           **Deery, S. W., Rej, J. E., Haro, D. and Gunderson, A. R.** (2021). Heat hardening in a  
258 pair of *Anolis* lizards: constraints, dynamics and ecological consequences. *J Exp Biol* **224**.
- 259           **Denny, M. W. and Dowd, W. W.** (2012). Biophysics, environmental stochasticity, and  
260 the evolution of thermal safety margins in intertidal limpets. *J Exp Biol* **215**, 934-47.
- 261           **Easton, D. P., Rutledge, P. S. and Spotila, J. R.** (1987). Heat shock protein induction  
262 and induced thermal tolerance are independent in adult salamanders. *Journal of Experimental*  
263 *Zoology* **241**, 263-267.
- 264           **Enriquez-Urzelai, U., Kearney, M. R., Nicieza, A. G. and Tingley, R.** (2019).  
265 Integrating mechanistic and correlative niche models to unravel range-limiting processes in a  
266 temperate amphibian. *Glob Chang Biol* **25**, 2633-2647.
- 267           **Feder, M. E. and Hofmann, G. E.** (1999). Heat-shock proteins, molecular chaperones,  
268 and the stress response: evolutionary and ecological physiology. *Annual Review of Physiology*  
269 **61**, 243-282.
- 270           **Gao, J., Zhang, W., Dang, W., Mou, Y., Gao, Y., Sun, B. J. and Du, W. G.** (2014).  
271 Heat shock protein expression enhances heat tolerance of reptile embryos. *Proc Biol Sci* **281**,  
272 20141135.
- 273           **Gilbert, A. L. and Miles, D. B.** (2019). Antagonistic Responses of Exposure to Sublethal  
274 Temperatures: Adaptive Phenotypic Plasticity Coincides with a Reduction in Organismal  
275 Performance. *Am Nat* **194**, 344-355.
- 276           **Gleason, L. U. and Burton, R. S.** (2015). RNA-seq reveals regional differences in  
277 transcriptome response to heat stress in the marine snail *Chlorostoma funebris*. *Mol Ecol* **24**,  
278 610-27.
- 279           **Gosner, K. L.** (1960). A Simplified Table for Staging Anuran Embryos and Larvae with  
280 Notes on Identification. *Herpetologica* **16**, 183-190.

281           **Gu, L. L., Li, M. Z., Wang, G. R. and Liu, X. D.** (2019). Multigenerational heat  
282 acclimation increases thermal tolerance and expression levels of Hsp70 and Hsp90 in the rice  
283 leaf folder larvae. *J Therm Biol* **81**, 103-109.

284           **Healy, T. M. and Schulte, P. M.** (2012). Factors affecting plasticity in whole-organism  
285 thermal tolerance in common killifish (*Fundulus heteroclitus*). *J Comp Physiol B* **182**, 49-62.

286           **Hoekstra, L. A. and Montooth, K. L.** (2013). Inducing extra copies of the Hsp70 gene  
287 in *Drosophila melanogaster* increases energetic demand. *BMC evolutionary biology* **13**, 1-11.

288           **Huey, R. B. and Stevenson, R.** (1979). Integrating thermal physiology and ecology of  
289 ectotherms: a discussion of approaches. *American Zoologist* **19**, 357-366.

290           **Jensen, L. T., Cockerell, F. E., Kristensen, T. N., Rako, L., Loeschcke, V.,**  
291 **McKechnie, S. W. and Hoffmann, A. A.** (2010). Adult heat tolerance variation in *Drosophila*  
292 *melanogaster* is not related to Hsp70 expression. *J Exp Zool A Ecol Genet Physiol* **313**, 35-44.

293           **Jin, J., Zhao, M., Wang, Y., Zhou, Z., Wan, F. and Guo, J.** (2019). Induced  
294 Thermotolerance and Expression of Three Key Hsp Genes (Hsp70, Hsp21, and sHsp21) and  
295 Their Roles in the High Temperature Tolerance of *Agasicles hygrophila*. *Front Physiol* **10**, 1593.

296           **Krebs, R. A. and Feder, M. E.** (1998). Hsp70 and larval thermotolerance in *Drosophila*  
297 *melanogaster*: how much is enough and when is more too much? *Journal of insect physiology* **44**,  
298 1091-1101.

299           **Lapwong, Y., Dejtardol, A. and Webb, J. K.** (2021a). Plasticity in thermal hardening  
300 of the invasive Asian house gecko. *Evolutionary Ecology*.

301           **Lapwong, Y., Dejtardol, A. and Webb, J. K.** (2021b). Shifts in thermal tolerance of  
302 the invasive Asian house gecko (*Hemidactylus frenatus*) across native and introduced ranges.  
303 *Biological Invasions* **23**, 989-996.

304           **Li, H., Wang, Z., Mei, W. and Ji, X.** (2009). Temperature acclimation affects thermal  
305 preference and tolerance in three *Eremias* lizards (Lacertidae). *Current Zoology* **55**, 258-265.

306           **Lowe, W. H., Martin, T. E., Skelly, D. K. and Woods, H. A.** (2021). Metamorphosis in  
307 an Era of Increasing Climate Variability. *Trends Ecol Evol* **36**, 360-375.

308           **Maness, J. D. and Hutchison, V. H.** (1980). Acute adjustment of thermal tolerance in  
309 vertebrate ectotherms following exposure to critical thermal maxima. *Journal of Thermal*  
310 *Biology* **5**, 225-233.

311 **Menke, M. E. and Claussen, D. L.** (1982). Thermal acclimation and hardening in  
312 tadpoles of the bullfrog, *Rana catesbeiana*. *Journal of Thermal Biology* **7**, 215-219.

313 **Moyen, N. E., Crane, R. L., Somero, G. N. and Denny, M. W.** (2020). A single heat-  
314 stress bout induces rapid and prolonged heat acclimation in the California mussel, *Mytilus*  
315 *californianus*. *Proc Biol Sci* **287**, 20202561.

316 **Phillips, B. L., Muñoz, M. M., Hatcher, A., Macdonald, S. L., Llewelyn, J., Lucy, V.,**  
317 **Moritz, C. and Grémillet, D.** (2016). Heat hardening in a tropical lizard: geographic variation  
318 explained by the predictability and variance in environmental temperatures. *Functional Ecology*  
319 **30**, 1161-1168.

320 **Rohr, J. R., Civitello, D. J., Cohen, J. M., Roznik, E. A., Sinervo, B. and Dell, A. I.**  
321 (2018). The complex drivers of thermal acclimation and breadth in ectotherms. *Ecol Lett* **21**,  
322 1425-1439.

323 **Rollins-Smith, L. A.** (2017). Amphibian immunity–stress, disease, and climate change.  
324 *Developmental & Comparative Immunology* **66**, 111-119.

325 **Ruthsatz, K., Dausmann, K. H., Peck, M. A. and Glos, J.** (2022). Thermal tolerance  
326 and acclimation capacity in the European common frog (*Rana temporaria*) change throughout  
327 ontogeny. *J Exp Zool A Ecol Integr Physiol*.

328 **Rutledge, P., Spotila, J. and Easton, D.** (1987). Heat hardening in response to two types  
329 of heat shock in the lungless salamanders *Eurycea bislineata* and *Desmognathus ochrophaeus*.  
330 *Journal of Thermal Biology* **12**, 235-241.

331 **Seneviratne, S., Zhang, I. X., Adnan, M., Badi, W., Dereczynski, C., Di Luca, A.,**  
332 **Ghosh, S., Iskandar, I., Kossin, J., Lewis, S. et al.** (2021). Weather and Climate Extreme  
333 Events in a Changing Climate. In: Climate Change 2021: The Physical Science Basis. In *Climate*  
334 *Change 2021: The Physical Science Basis. Contribution of Working Group I to the Sixth*  
335 *Assessment Report of the Intergovernmental Panel on Climate Change* eds. V. Masson-Delmotte  
336 P. Zhai A. Pirani S. L. Connors C. Péan S. Berger N. Caud Y. Chen L. Goldfarb M. I. Gomis et  
337 al.): Cambridge University Press.

338 **Sgro, C. M., Overgaard, J., Kristensen, T. N., Mitchell, K. A., Cockerell, F. E. and**  
339 **Hoffmann, A. A.** (2010). A comprehensive assessment of geographic variation in heat tolerance  
340 and hardening capacity in populations of *Drosophila melanogaster* from eastern Australia. *J Evol*  
341 *Biol* **23**, 2484-93.

- 342           **Sherman, E. and Levitis, D.** (2003). Heat hardening as a function of developmental  
343 stage in larval and juvenile *Bufo americanus* and *Xenopus laevis*. *Journal of Thermal Biology*  
344 **28**, 373-380.
- 345           **Simon, M. N., Ribeiro, P. L. and Navas, C. A.** (2015). Upper thermal tolerance  
346 plasticity in tropical amphibian species from contrasting habitats: implications for warming  
347 impact prediction. *J Therm Biol* **48**, 36-44.
- 348           **Somero, G. N.** (2010). The physiology of climate change: how potentials for  
349 acclimatization and genetic adaptation will determine 'winners' and 'losers'. *J Exp Biol* **213**, 912-  
350 20.
- 351           **Sørensen, J. G., Kristensen, T. N. and Loeschke, V.** (2003). The evolutionary and  
352 ecological role of heat shock proteins. *Ecology Letters* **6**, 1025-1037.
- 353           **Sørensen, J. G., Pekkonen, M., Lindgren, B., Loeschke, V., Laurila, A. and Merilä,**  
354 **J.** (2009). Complex patterns of geographic variation in heat tolerance and Hsp70 expression  
355 levels in the common frog *Rana temporaria*. *Journal of Thermal Biology* **34**, 49-54.
- 356           **Stillman, J. H.** (2003). Acclimation capacity underlies susceptibility to climate change.  
357 *Science* **301**, 65-65.
- 358           **Turriago, J. L., Tejedo, M., Hoyos, J. M. and Bernal, M. H.** (2022). The effect of  
359 thermal microenvironment in upper thermal tolerance plasticity in tropical tadpoles. Implications  
360 for vulnerability to climate warming. *J Exp Zool A Ecol Integr Physiol* **337**, 746-759.
- 361           **van Heerwaarden, B. and Kellermann, V.** (2020). Does Plasticity Trade Off With  
362 Basal Heat Tolerance? *Trends Ecol Evol* **35**, 874-885.
- 363           **Zatsepina, O., Ulmasov, K. A., Beresten, S., Molodtsov, V., Rybtsov, S. and**  
364 **Evgen'Ev, M.** (2000). Thermotolerant desert lizards characteristically differ in terms of heat-  
365 shock system regulation. *Journal of Experimental Biology* **203**, 1017-1025.
- 366           **Zatsepina, O. G., Velikodvorskaia, V. V., Molodtsov, V. B., Garbuz, D., Lerman, D.**  
367 **N., Bettencourt, B. R., Feder, M. E. and Evgenev, M. B.** (2001). A *Drosophila melanogaster*  
368 strain from sub-equatorial Africa has exceptional thermotolerance but decreased Hsp70  
369 expression. *Journal of Experimental Biology* **204**, 1869-1881.

370

371

372 **Table 1: Mean critical thermal maximum ( $CT_{max}$ ) of control and hardened larval wood**  
373 **frogs at different acclimation temperatures and acclimation periods.**

| Group      | Control (°C)   | Hardened (°C)  |
|------------|----------------|----------------|
| 15°C Day 3 | 36.8 ± 0.1 (7) | 36.9 ± 0.3 (8) |
| 25°C Day 3 | 37.4 ± 0.1 (8) | 37.8 ± 0.2 (7) |
| 15°C Day 7 | 36.5 ± 0.2 (7) | 37.4 ± 0.2 (7) |
| 25°C Day 7 | 39.0 ± 0.1 (8) | 39.1 ± 0.1 (7) |

374 Data are means ± standard error, with sample size in parentheses.

375



376 **Table 2: Effects of body mass, Gosner stage, hardening treatment, acclimation period, and**  
377 **acclimation temperature on larval wood frog critical thermal maximum from a generalized**  
378 **linear model.**

| Source of Variation                                      | S. S. | d. f. | F     | P                 |
|----------------------------------------------------------|-------|-------|-------|-------------------|
| Log-Transformed Body Mass                                | 0.14  | 1     | 0.73  | 0.40              |
| Gosner Stage                                             | 0.22  | 1     | 1.15  | 0.29              |
| Hardening                                                | 0.017 | 1     | 0.088 | 0.77              |
| Acclimation Period                                       | 0.49  | 1     | 2.55  | 0.12              |
| Acclimation Temperature                                  | 1.25  | 1     | 6.52  | <b>0.014</b>      |
| Hardening x Acclimation Period                           | 1.17  | 1     | 6.11  | <b>0.017</b>      |
| Hardening x Acclimation Temperature                      | 0.094 | 1     | 0.49  | 0.49              |
| Acclimation Period x Acclimation Temperature             | 3.57  | 1     | 18.71 | <b>&lt; 0.001</b> |
| Hardening x Acclimation Period x Acclimation Temperature | 0.85  | 1     | 4.47  | <b>0.040</b>      |
| Residuals                                                | 9.35  | 49    |       |                   |

379 Values in bold indicate significant differences,  $p < 0.05$ .

380

381 **Figure Legend**

382 **Figure 1: Heat tolerance of larval wood frogs across differing acclimation conditions and**  
383 **hardening.** Larval wood frog critical thermal maximum ( $CT_{max}$ ) exposed to two different  
384 acclimation temperatures (15° and 25°C), two different acclimation periods (3 and 7 days), and a  
385 hardening treatment (control vs. hardened). Points represent individual larvae. Center lines  
386 within boxplots represent the median and the boxes denote the interquartile range with whiskers  
387 representing 1.5x the upper or lower quartile. Letters indicate significant differences between  
388 post hoc pairwise comparisons (Tukey HSD,  $P < 0.05$ ).

389

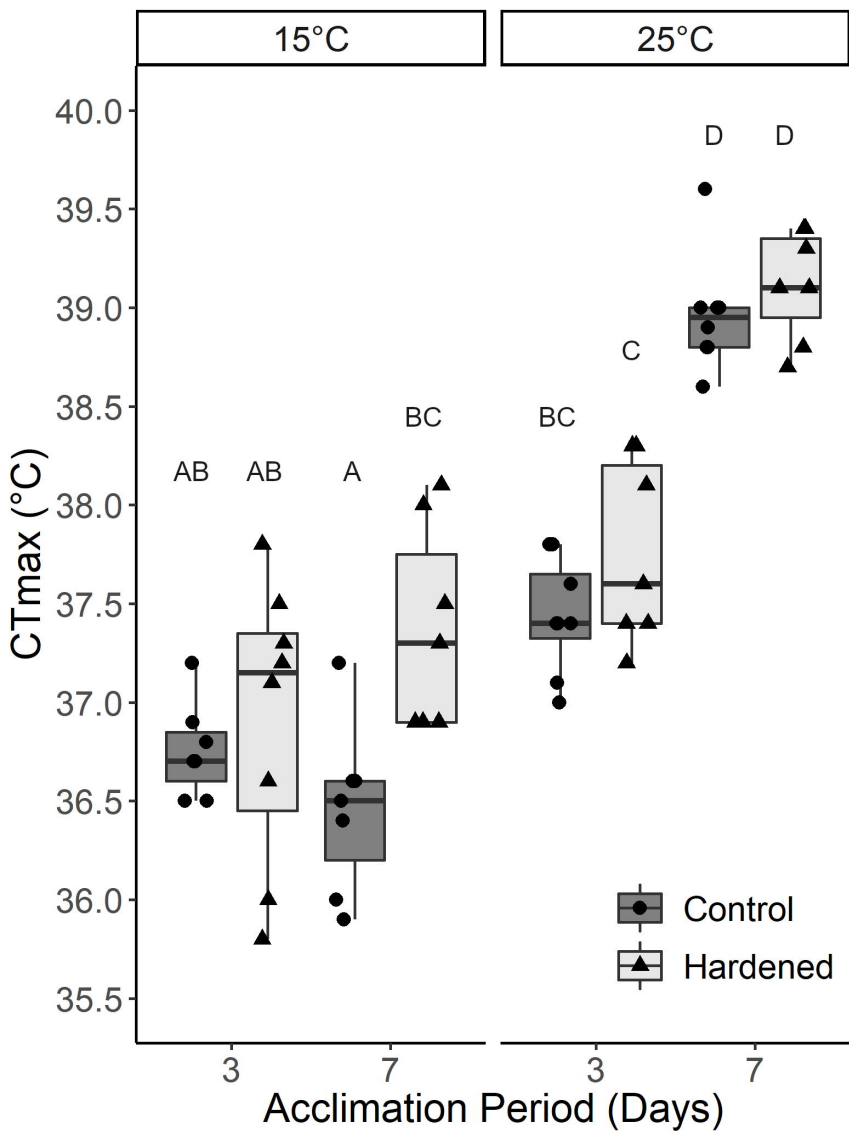

Source: https://www.biorxiv.org/content/10.1101/2022.09.19.508599v1.full.pdf
